# Supplementary material for: Mechanical Properties of Vacancy Tuned Carbon Honeycomb
Source: Nanomaterials (Basel). 2019 Jan 27;9(2):156. doi: 10.3390/nano9020156 (PMC6410302; doi:10.3390/nano9020156)
Supplement: Supplementary file 1 [file nanomaterials-09-00156-s001.zip]

Archive with 4 entries (4 files):
- Supplementary Files.pdf
- Video S1.avi
- Video S2.avi
- Video S3.avi
